# Supplementary material for: All oxide based flexible multi-folded invisible synapse as vision photo-receptor
Source: PubMed Central journal article supplement (PMC9880003; doi:10.1038/s41598-023-28505-3), 2023-01-26
Supplement: 41598_2023_28505_MOESM1_ESM.pdf [file 41598_2023_28505_MOESM1_ESM.pdf]

# All Oxide Based Flexible Multi-Folded Invisible Synapse as Vision Photo-receptor

Ping-Xing Chen,<sup>a</sup> Debashis Panda,<sup>a,b\*</sup> and Tseung-Yuen Tseng<sup>a</sup>

<sup>a</sup> Institute of Electronics, National Yang Ming Chiao Tung University, Hsinchu City 30010, Taiwan

<sup>b</sup> Department of Electronics and Communication Engineering, CV Raman Global University, Bhubaneswar 752054, India.

\*Corresponding author: phy.dpanda@gmail.com; ece.dpanda@nycu.edu.tw; ece.dpanda@cgu-odisha.ac.in

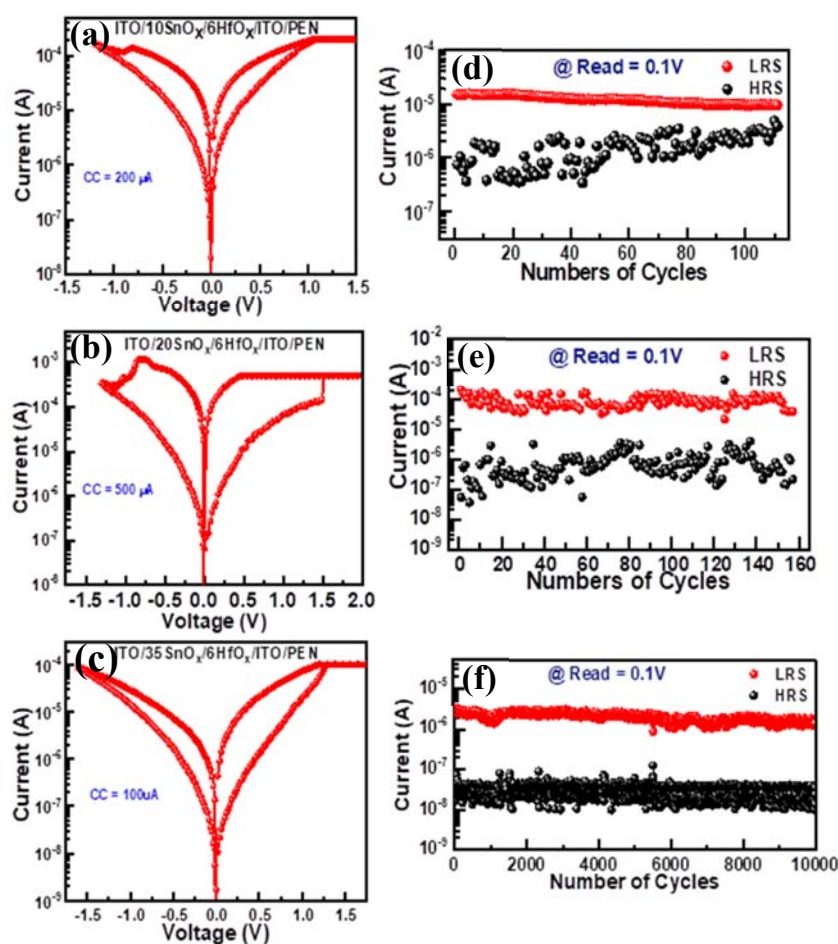

**Figure S1:** (a), (b) and (c): The optimization of the current-voltage bipolar switching curves of different SnO<sub>x</sub> thicknesses of 5, 20 and 35 nm devices having 6 nm HfO<sub>x</sub> layer for each device ; (e), (f) and (g) are the corresponding endurance results, respectively. The minimum compliance current is used to obtain the best switching and endurance performances. The 35 nm thick SnO<sub>x</sub> layer device can sustain well for more than 10000 cycles along with gradual switching at a low compliance current.
